# Supplementary material
Source: MDPI journal article supplement (https://www.mdpi.com/2073-4441/16/3/426)
Supplement: s1 [file s1]

Archive with 2 entries (2 files):
- File S1.txt
- Supplemental Material.pdf
