# Supplementary material
Source: MDPI journal article supplement (https://www.mdpi.com/2073-4441/16/3/426)
Supplement: s1 [file s1 › File S1.txt]

### FILE S1 
  # R CODE FOR ANALYSIS FOR THE PAPER TITLED: Differential impacts of road de-icers on freshwater bacterial communities
  # BY: Troy A. Martin, Collin L. Juurakko, Tia Harrison, Shelley E. Arnott, Virginia K. Walker 

################################################################################

## BACTERIAL COMMUNITY CODE 

# Load Packages 
source("https://bioconductor.org/biocLite.R")
BiocManager::install(version = '3.18')
library("phyloseq"); packageVersion("phyloseq")
devtools::install_github("jbisanz/qiime2R")
install.packages("BiocManager")
BiocManager::install("phyloseq")
install.packages("ggplot2")
install.packages("qiime2R")
library(phyloseq)
library(ggplot2)
library(qiime2R)
library(dplyr)
library(ggplot2)
library(readxl)
library(tibble)
library(plyr)
library(vegan)
library(multcompView)

########################################

setwd("/Users/troymartin/Library/CloudStorage/OneDrive-Queen'sUniversity/MSc/Analysis/Bacteria") 
physeq<-qza_to_phyloseq(
  features="table-dada2.qza",
  tree="SEPP-tree.qza",
  taxonomy="taxonomy.qza",
  metadata="TM-metadata.txt"
) # Make the phyloseq object 

Physeq2 <- merge_samples(physeq, "grouping") # Make sure these match metadata file 

# Build barplots 
df <- as.data.frame(lapply(sample_data(physeq),function (y) if(class(y)!="factor" ) as.factor(y) else y),stringsAsFactors=T)
row.names(df) <- sample_names(physeq)
sample_data(physeq) <- sample_data(df)

physeq2 = filter_taxa(physeq, function(x) mean(x) > 0.3, TRUE) 
physeq3 = subset_taxa(physeq2, (Genus!="NA")) # Removed any taxa without a Genus assigned
physeq4 = subset_taxa(physeq3, (Genus!="uncultured")) # This removed anything designated uncultured
ps <- tax_glom(physeq4, "Genus", NArm=FALSE) # Add to restrict ASVs unclassified to the genus level to make a cleaner plot
ps0 <- transform_sample_counts(ps, function(x) x / sum(x)) # Average relative abundance
ps1 <- merge_samples(ps0, "grouping") # Merge to averages 
ps2 <- transform_sample_counts(ps1, function(x) x / sum(x)) # Back to relative abun. 

data_glom<- psmelt(ps2) 
data_glom$Genus <- as.character(data_glom$Genus) 
data_glom$Sample = as.factor(data_glom$Sample)

# Rename grouped genera with below threshold
data_glom$Genus[data_glom$Abundance < 0.03] <- "< 3% Abundant" # Remember to change this if you change the value above

#Count # phyla to set color palette
Count = length(unique(data_glom$Genus))
Count 

unique(data_glom$Genus) # Tells you the names of the genera that will be on the plot
myPalette2 = c("white","#ff6961","#ffb480","#ffd500","#42d6a4","#08cad1","#59adf6","#9d94ff","#c780e8","#01eebf","#d5001c",
                      "#029cdf","#ff3f2a","#3644c5","#fff184","#6e90ff","#be9200","#006abb","#9e6100","#ffa1ff","#6b5d00","#e60064",
                      "#b1ffd5","#962f4c","#b0d1ff","#ff736c","#01637e","#ffdda9","#806e8e","#52582b", "#000000","#4DAA57","#86BBD8",
                      "#A54657", "darkblue", "darkgoldenrod1", "darkseagreen", "darkorchid", "darkolivegreen1", "lightskyblue", 
                      "darkgreen", "deeppink", "khaki2", "firebrick", "brown1", "darkorange1", "cyan1", "royalblue4", "darksalmon")

# Basic barplots with average relative abundance for genera
levels = c("CT", "HB", "HM", "HS", "MB", "MM", "MS", "LB", "LM", "LS") # Reordering the data 
levels.new = c("CT", "LS", "MS", "HS", "LM", "MM", "HM", "LB", "MB", "HB")
spatial_plot = ggplot(data=data_glom, aes(x=factor(Sample, level = levels.new), y=Abundance, fill=Genus))

setwd("/Users/troymartin/Library/CloudStorage/OneDrive-Queen'sUniversity/MSc/Analysis/Figures/Bacteria")
png("StackedPlot.new.png",width=1250,height=800) 
spatial_plot + 
  geom_bar(aes(), colour="black", stat="identity", position="stack") +
  scale_fill_manual(values=myPalette2) +
  main.theme +
  theme(legend.position="right") + guides(fill=guide_legend(nrow=Count))+
  theme(strip.background = element_blank(),
        axis.text.x.bottom = element_text(angle = 0)) +
  theme(legend.text=element_text(size=10)) + 
  theme(legend.justification = c(0,0.6)) + 
  labs(x = "Treatment")+
  scale_x_discrete(limits = c("CT", "LS", "MS", "HS", "LM", "MM", "HM", "LB", "MB", "HB"),
                   labels=c("Control",
                            "L. RS", "M. RS", "H. RS",
                            "L. Inorg.", "M. Inorg.", "H. Inorg.", # Changing the labels 
                            "L. Org.", "M. Org.", "H. Org."))
dev.off()


######################################

## Alpha Diversity 

anova.sh = aov(richness$Shannon ~ sample_data(ps)$grouping)
anova.sh = aov(richness$Shannon ~ richness$grouping)
summary(anova.sh) 
tukey <- TukeyHSD(anova.sh)
tukey.cld <- multcompLetters4(anova.sh, tukey)
print(tukey.cld) 

# Plotting richness 
plot_richness(physeq, measures=c("Shannon"), x = "samples") +  
  main.theme + 
  geom_boxplot(outlier.color=NA)

richness <- estimate_richness(physeq, measures = c("Shannon")) # Uses the original physeq object
richness = as.data.frame(richness)
head(richness)
groupings = as.data.frame(c("HB", "HM", "HS", 'HB', "HM", 'HB', 'HM', "HS", 
              "LM", 'LS', 'LS', 'LB', 'LS', 
              'MM', 'MS','MB', 'MM', 'MS', 'MM', 
              'CT', 'CT', 'CT', 
              'LB', 'MB', 'MS', 'HS',
              'LB', 'LM', 'LM', 'MB'))
treats = as.data.frame(c("B", "M", "S", 'B', "M", 'B', 'M', "S", 
                         "M", 'S', 'S', 'B', 'S', 
                         'M', 'S','B', 'M', 'S', 'M', 
                         'CT', 'CT', 'CT', 
                         'B', 'B', 'S', 'S',
                         'B', 'M', 'M', 'B'))
colnames(groupings) = "grouping"
colnames(treats) = "Treatment"
richness = cbind(richness, groupings)
richness = cbind(richness, treats)

# Plot 
setwd("/Users/troymartin/Library/CloudStorage/OneDrive-Queen'sUniversity/MSc/Analysis/Figures/Bacteria")
png("ShanDivPlot.new.png",width=900,height=550) 
ggplot()+
  geom_boxplot(data = richness, aes(x = grouping, y = Shannon, fill = Treatment)) + 
  main.theme + 
  labs(x = "", y = expression(alpha*" Shannon's Diversity"), legend = "Treatment") +
  scale_fill_manual(
    values = c("#000000", "#DE1760","#E69F00", "#0072B2"),
    breaks = c("CT","B","M","S"),
    labels = c("Control","Organic", "Inorganic","Road Salt"))+ 
  scale_x_discrete(limits = c("CT", "LS", "MS", "HS", "LM", "MM", "HM", "LB", "MB", "HB"),
                     labels=c("Control",
                            "Low", "Medium", "High",
                            "Low", "Medium", "High",
                            "Low", "Medium", "High"))+ 
  theme(axis.text.x = element_text(angle = 45, vjust = 1, hjust = 1))
dev.off()

######################################

# Beta diversity
install.packages("ggforce")
library(ggforce)

pso <- ordinate(physeq, "PCoA", "wunifrac") # Used the weighted unifrac method

sample_data(physeq)$grouping <- factor(sample_data(physeq)$grouping, 
                                        levels = c("CT", "LS", "MS", "HS", "LM", "MM", "HM", "LB", "MB", "HB")) 

ordplot5 <- plot_ordination(physeq, pso, type="samples", color="grouping", shape = "grouping") # Check the metadata to ensure righ variable 

## Road salt (S) ellipses 
rs = ordplot5 +
  main.theme + 
  theme(text = element_text(size = 13), aspect.ratio = 1) + 
  geom_point(aes(shape = grouping, color = grouping), size = 3) + 
  geom_mark_ellipse(aes(fill = grouping), alpha = 0.1)+ 
  scale_shape_manual(
    values = c(0, 1, 2, 4, 5, 15, 16, 17, 18, 25), 
    breaks = c("CT", "LS", "MS", "HS", "LM", "MM", "HM", "LB", "MB", "HB"), 
    labels = c("Control", "Low Salt", "Med. Salt", "High Salt", 
               "Low Inorganic", "Med. Inorganic", "High Inorganic", 
               "Low Organic", "Med. Organic", "High Organic"), 
    name = "Level & Treatment") + 
  scale_alpha_manual(
    values = c(1, 1, 1, 1, 0, 0, 0, 0, 0, 0), 
    breaks = c("CT", "LS", "MS", "HS", "LM", "MM", "HM", "LB", "MB", "HB"), 
    labels = c("Control", "Low Salt", "Med. Salt", "High Salt", 
               "Low Inorganic", "Med. Inorganic", "High Inorganic", 
               "Low Organic", "Med. Organic", "High Organic"), 
    name = "Level & Treatment")+ 
  scale_color_manual(
    values = c("#000000","#0072B2","#0072B2","#0072B2","NA","NA","NA","NA","NA","NA"), 
    breaks = c("CT", "LS", "MS", "HS", "LM", "MM", "HM", "LB", "MB", "HB"), 
    labels = c("Control", "Low Salt", "Med. Salt", "High Salt", 
               "Low Inorganic", "Med. Inorganic", "High Inorganic", 
               "Low Organic", "Med. Organic", "High Organic"), 
    name = "Level & Treatment") + 
  scale_fill_manual(
    values = c("#000000","#0072B2","#0072B2","#0072B2","NA","NA","NA","NA","NA","NA"), 
    breaks = c("CT", "LS", "MS", "HS", "LM", "MM", "HM", "LB", "MB", "HB"), 
    labels = c("Control", "Low Salt", "Med. Salt", "High Salt", 
               "Low Inorganic", "Med. Inorganic", "High Inorganic", 
               "Low Organic", "Med. Organic", "High Organic"), 
    name = "Level & Treatment")

## Beet juice de-icer (B) ellipses  
bj = ordplot5 +
  main.theme + 
  theme(text = element_text(size = 13), aspect.ratio = 1) + 
  geom_point(aes(shape = grouping, color = grouping), size = 3) + 
  geom_mark_ellipse(aes(fill = grouping), alpha = 0.1)+ 
  scale_shape_manual(
    values = c(0, 1, 2, 4, 5, 15, 16, 17, 18, 25), 
    breaks = c("CT", "LS", "MS", "HS", "LM", "MM", "HM", "LB", "MB", "HB"), 
    labels = c("Control", "Low Salt", "Med. Salt", "High Salt", 
               "Low Inorganic", "Med. Inorganic", "High Inorganic", 
               "Low Organic", "Med. Organic", "High Organic"), 
    name = "Level & Treatment") + 
  scale_alpha_manual(
    values = c(1, 0, 0, 0, 0, 0, 0, 1, 1, 1), 
    breaks = c("CT", "LS", "MS", "HS", "LM", "MM", "HM", "LB", "MB", "HB"), 
    labels = c("Control", "Low Salt", "Med. Salt", "High Salt", 
               "Low Inorganic", "Med. Inorganic", "High Inorganic", 
               "Low Organic", "Med. Organic", "High Organic"), 
    name = "Level & Treatment")+ 
  scale_color_manual(
    values = c("#000000","NA","NA","NA","NA","NA","NA","#DE1760","#DE1760","#DE1760"), 
    breaks = c("CT", "LS", "MS", "HS", "LM", "MM", "HM", "LB", "MB", "HB"), 
    labels = c("Control", "Low Salt", "Med. Salt", "High Salt", 
               "Low Inorganic", "Med. Inorganic", "High Inorganic", 
               "Low Organic", "Med. Organic", "High Organic"), 
    name = "Level & Treatment") + 
  scale_fill_manual(
    values = c("#000000","NA","NA","NA","NA","NA","NA","#DE1760","#DE1760","#DE1760"), 
    breaks = c("CT", "LS", "MS", "HS", "LM", "MM", "HM", "LB", "MB", "HB"), 
    labels = c("Control", "Low Salt", "Med. Salt", "High Salt", 
               "Low Inorganic", "Med. Inorganic", "High Inorganic", 
               "Low Organic", "Med. Organic", "High Organic"), 
    name = "Level & Treatment")

## Master melt inorganic (M) ellipses  
mm = ordplot5 +
  main.theme + 
  theme(text = element_text(size = 13), aspect.ratio = 1) + 
  geom_point(aes(shape = grouping, color = grouping), size = 3) + 
  geom_mark_ellipse(aes(fill = grouping), alpha = 0.1)+ 
  scale_shape_manual(
    values = c(0, 1, 2, 4, 5, 15, 16, 17, 18, 25), 
    breaks = c("CT", "LS", "MS", "HS", "LM", "MM", "HM", "LB", "MB", "HB"), 
    labels = c("Control", "Low Salt", "Med. Salt", "High Salt", 
               "Low Inorganic", "Med. Inorganic", "High Inorganic", 
               "Low Organic", "Med. Organic", "High Organic"), 
    name = "Level & Treatment") + 
  scale_alpha_manual(
    values = c(1, 0, 0, 0, 1, 1, 1, 0, 0, 0), 
    breaks = c("CT", "LS", "MS", "HS", "LM", "MM", "HM", "LB", "MB", "HB"), 
    labels = c("Control", "Low Salt", "Med. Salt", "High Salt", 
               "Low Inorganic", "Med. Inorganic", "High Inorganic", 
               "Low Organic", "Med. Organic", "High Organic"), 
    name = "Level & Treatment")+ 
  scale_color_manual(
    values = c("#000000","NA","NA","NA","#E69F00","#E69F00","#E69F00","NA","NA","NA"), 
    breaks = c("CT", "LS", "MS", "HS", "LM", "MM", "HM", "LB", "MB", "HB"), 
    labels = c("Control", "Low Salt", "Med. Salt", "High Salt", 
               "Low Inorganic", "Med. Inorganic", "High Inorganic", 
               "Low Organic", "Med. Organic", "High Organic"), 
    name = "Level & Treatment") + 
  scale_fill_manual(
    values = c("#000000","NA","NA","NA","#E69F00","#E69F00","#E69F00","NA","NA","NA"), 
    breaks = c("CT", "LS", "MS", "HS", "LM", "MM", "HM", "LB", "MB", "HB"), 
    labels = c("Control", "Low Salt", "Med. Salt", "High Salt", 
               "Low Inorganic", "Med. Inorganic", "High Inorganic", 
               "Low Organic", "Med. Organic", "High Organic"), 
    name = "Level & Treatment")

setwd("/Users/troymartin/Library/CloudStorage/OneDrive-Queen'sUniversity/MSc/Analysis/Figures/Bacteria")
png("BetaDiv.pcoa.png",width=1200,height=800) 
ggarrange(rs, mm, bj, ncol = 3, nrow = 1, common.legend = TRUE, legend="none")
dev.off()

# Beta diversity statistics 
type.wunifrac <- phyloseq::distance(physeq, method = "wunifrac") # Match the method �wunifrac� 
sampledf <- data.frame(sample_data(physeq))

#PERMDISP
beta.wunifrac <- betadisper(type.wunifrac, sampledf$grouping, type = "centroid", bias.adjust = TRUE)
permdisp <- permutest(beta.wunifrac, pairwise = TRUE, permutations = 10000)
permdisp
#PERMANOVA
adonis.bray <- adonis2(type.wunifrac ~ grouping, data = sampledf, permutations = 10000)
adonis.bray
#PAIRWISE PERMANVA
permanova <- pairwise.adonis(type.wunifrac, factors = sampledf$grouping)
permanova.sum <- summary.pwadonis(permanova)

################################################################################

### CHLOROPHYLL A DATA 

setwd("/Users/troymartin/Library/CloudStorage/OneDrive-Queen'sUniversity/MSc/Analysis")
chla = read.csv("Chla_All.csv")

# Libraries 
library(ggplot2)
library(gridExtra)
library(dplyr)
library(mgcv)
library(car)
library(MuMIn)
library(bbmle)
library(ggfortify)
library(pscl)
library(AICcmodavg)
library(ggpubr)

main.theme <- theme(
  axis.ticks = element_line(linewidth=0.5, colour="black"),
  axis.text.x = element_text(size=21, colour="black"),
  axis.text.y = element_text(size=21, colour="black"),
  axis.title.x = element_text(size=23, colour="black", vjust=+0.7),
  axis.title.y = element_text(size=23, colour="black", vjust=+0.35),
  panel.background = element_rect(fill="white", colour="black", linewidth =1),
  plot.margin = unit(c(0.1,0.7,0.1,0.1),"cm"),
  panel.border = element_blank(),
  panel.grid.major = element_blank(),
  panel.grid.minor = element_blank(),
  legend.position = "right",
  legend.title = element_text(face="bold", size=23),
  legend.text = element_text(size = 23),
  legend.key = element_rect(fill = NA),
  plot.title = element_text(size=21, colour="black",hjust = +0.5, vjust=1, face="bold")
)

make_ci <- function(pred, data){
  # fit, lower, and upper CI
  fit <- pred$fit
  lower <- fit - 1.96*pred$se.fit
  upper <- fit + 1.96*pred$se.fit
  return(data.frame(fit,lower,upper, data))
}

options(na.action = "na.fail")

####################################

# Change the negative Cl to 0 
chla = pmax(chla, 0) # For some reason this turned my neg values to NA
chla$Actual_Cl[is.na(chla$Actual_Cl)] = 0 # But I fixed it easily here; leaving NA chla values as such 

chla$Treatment = as.factor(chla$Treatment) # Making the treatments factors 

colnames(chla) = c("Week", "Treatment", "Nominal_Cl", "Actual_Cl", "Chla")
chla = chla %>% filter(!((Nominal_Cl == 420) & (Treatment == "B")))
chla = chla %>% filter(!((Nominal_Cl == 516) & (Treatment == "B")))

w6 = filter(chla, Week == 6)
chla.w0 = filter(chla, Week == 0)

plot(Chla ~ Actual_Cl, data = w6)

#####################################

## Model checking using GLMs and GAMs
chla.glm = glm(Chla ~ Actual_Cl * Treatment, data = w6, family=Gamma(link= "log")) 
  # Also check families of gaussian & poisson, with links: inverse & identity 
summary(chla.glm)
dredge(chla.glm)
autoplot(chla.glm)

chla.gam = gam(Chla ~ s(Actual_Cl) + s(Actual_Cl, by = Treatment)+ Treatment, method = "REML", 
               select = T, data = w6, family = Gamma(link = "log"))
  # Also check families of gaussian & poisson, with links: inverse & identity 
summary(chla.gam)
plot(chla.gam, residuals = T, pch = 1)
gam.check(chla.gam)
dredge(chla.gam)

AICc(chla.glm); AICc(chla.gam) # Compare AICcs of all families and links to determine best model 

#####################################
best.chla = gam(Chla ~ s(Actual_Cl, by = Treatment) , method = "REML", select = T, 
                data = w6, family = Gamma(link = "log")) #+ s(Actual_Cl)
summary(best.chla)
gam.check(best.chla)
k.check(best.chla)

chla.df = expand.grid(Actual_Cl = seq(min(w6$Actual_Cl), max(w6$Actual_Cl), by = 1),
                      Treatment = c("B", "M", "S")) 
chla.pred = predict(best.chla, newdata=chla.df, se.fit = T, type="response") 
chla_CI <- make_ci(chla.pred, chla.df)
colnames(chla_CI) = c("fit", "lower", "upper", "Actual_Cl", "Treatment")

######################################
chla. = ggplot()+ 
  geom_point(data = w6, aes(x = Actual_Cl, y = Chla, color = Treatment, shape = Treatment), size = 6.5) +
  main.theme +
  labs(x="Chloride (mg/L)", y= expression(paste("Chlorophyll ", italic("a ") , "(", mu, "g/L)")),title = "") +
  geom_line(data=chla_CI, aes(x=Actual_Cl, y=fit, col = Treatment), linewidth=1, show.legend=F) + # Trendline 
  geom_ribbon(data=chla_CI, aes(x=Actual_Cl, ymin=lower, ymax=upper, fill = Treatment), alpha=0.2,show.legend=F) +
  scale_color_manual(
    values = c("#0072B2", "#DE1760","#E69F00"),
    breaks = c("S","B","M"),
    labels = c("Road Salt","Organic", "Inorganic")) +  
  scale_shape_manual(
    values = c(19, 17, 15),
    breaks = c("S","B","M"),
    labels = c("Road Salt","Organic", "Inorganic")) 

setwd("/Users/troymartin/Library/CloudStorage/OneDrive-Queen'sUniversity/MSc/Analysis/Figures/Thesis")
png("Chla.png",width=1000,height=600) 
ggarrange(chla., ncol=1, nrow=1, common.legend = TRUE, legend="top")
dev.off()

################################################################################
## PHYS CHEM PROPERTIES 

# Dissolved oxygen 
meso.id = read.csv("~/Library/CloudStorage/OneDrive-Queen'sUniversity/MSc/Analysis/MesoInfo.csv")
do = read.csv("~/Library/CloudStorage/OneDrive-Queen'sUniversity/MSc/Analysis/DissolvedO2.csv")

ions2 = meso.id %>% dplyr::select(3, 5:10) # Filter specific columns 
do = do %>% 
  dplyr::group_by(sampleID) %>% 
  summarise(Avg.DO = mean(DO)) # Averaging all weeks' DO 

ions = inner_join(ions2, do, by = "sampleID") # Joins dfs 
ions = pmax(ions, 0) # For some reason this turned my neg values to NA
ions[21,3] = 0
ions[41,3] = 0
do$Nominal_Cl = as.factor(do$Nominal_Cl)

do.b = filter(do, Treatment == "B") # Filter 
plot(DO ~ Week, data = do.b)

setwd("/Users/troymartin/Library/CloudStorage/OneDrive-Queen'sUniversity/MSc/Analysis/Figures/Thesis")
png("DO_Weeks.png",width=1400,height=1000) 
do.start = ggplot()+ 
  geom_line(data = do.b, aes(x= Week, y = DO, color = Nominal_Cl,), lwd = 1)+
  #geom_point(data = do.b, aes(x= Week, y = DO, shape = Nominal_Cl,))+ 
  main.theme+
  scale_color_discrete(name = expression("Nominal Cl"^"-"))+ 
  lims(x = c(1,6))+ 
  scale_x_continuous(name = "Week", breaks = 1:6)+ 
  labs(y = "DO (mg/L)")
dev.off()
# Export the file to manually do the averaging quickly in excel; averaging L, M, H DO values 
write.csv(do.b, "/Users/troymartin/Library/CloudStorage/OneDrive-Queen'sUniversity/MSc/Analysis/Figures/Bacteria/do.b.csv", 
          row.names = F)
do.b.avg = read.csv("/Users/troymartin/Library/CloudStorage/OneDrive-Queen'sUniversity/MSc/Analysis/Figures/Bacteria/do.bNEW.csv")
do.b.avg = do.b.avg %>% filter(Nominal_Cl == "L" | Nominal_Cl == "M" | Nominal_Cl == "H")
do.b.avg$Nominal_Cl = as.factor(do.b.avg$Nominal_Cl)

# Add the average lines to the plot 
new.do = do.start +
  geom_line(data = do.b.avg, aes(x= Week, y = DO, col = Nominal_Cl), lwd = 18, alpha = 0.30)
setwd("/Users/troymartin/Library/CloudStorage/OneDrive-Queen'sUniversity/MSc/Analysis/Figures/Bacteria")
png("DO_Weeks-Avgs.png",width=1400,height=1000) 
ggarrange(new.do, ncol = 1, nrow = 1, common.legend = TRUE, legend="none")
dev.off()

# Basic DO plot 
do.w6 = filter(ions, Week == 6)
do.w6$Treatment = do.w6$Treatment.x
do.w6plot = ggplot()+ 
  geom_point(data = (dotest), aes(Actual_Cl, DO, color = Treatment, shape = Treatment), size = 6.5) +
  main.theme + 
  labs(x="Chloride (mg/L)", y= expression("Dissolved O"[2]*" (mg/L)")) +
  scale_color_manual(
    values = c("#0072B2", "#DE1760","#E69F00", "black"),
    breaks = c("S","B","M", "CT"),
    labels = c("Road Salt","Organic", "Inorganic", "Control")) +  
  scale_shape_manual(
    values = c(19, 17, 15, 18),
    breaks = c("S","B","M", "CT"),
    labels = c("Road Salt","Organic", "Inorganic", "Control"))

ggarrange(do.w6plot, ncol=1, nrow=1, common.legend = TRUE, legend="none")

#######################################
## Ions 
## Adding a CT point 
do.w6 = do.w6[, c(2:8, 10)] # This one is for ions
do.w6[21,2] = 0 ; do.w6[21,4] = 0
do.w6[41,2] = 0 ; do.w6[41,4] = 0

# IONS 
filter(do.w6, Nominal_Cl == 6)
test = c()
test3 = c("CT", 9.2438, 23.53, 1.107, 4.963, 3.973, 6, 6)
test1 = c("CT", 0, 24.19, 0.00, 4.943, 4.367, 6, 6) 
test2 = c("CT", 0, 23.63, 0.00, 4.859, 4.223, 6, 6)
test = rbind(test3, test1, test2)
test = as.data.frame(test)
#test = t(test)
colnames(test) = c("Treatment.x", "Actual_Cl", "Actual_Ca", "Actual_K", "Actual_Mg", "Actual_Na", "Week", "Nominal_Cl")
dotest = rbind(do.w6, test)
dotest$Actual_Cl = as.numeric(dotest$Actual_Cl)
dotest$Actual_Ca = as.numeric(dotest$Actual_Ca)
dotest$Actual_K = as.numeric(dotest$Actual_K)
dotest$Actual_Mg = as.numeric(dotest$Actual_Mg)
dotest$Actual_Na = as.numeric(dotest$Actual_Na)
dotest$Treatment = dotest$Treatment.x
dotest = dotest[-c(1, 21, 41),]

#######################################
# Ion Graphs 
na.plot = ggplot()+ 
  geom_point(data = (dotest), aes(Actual_Cl, Actual_Na, color = Treatment, shape = Treatment), size = 6.5) +
  main.theme + 
  labs(x="", y= expression("Na"^"+"*" ("*mu*"g/L)")) + 
  scale_color_manual(
    values = c("#0072B2", "#DE1760","#E69F00", "black"),
    breaks = c("S","B","M", "CT"),
    labels = c("Road Salt","Organic", "Inorganic", "Control")) +  
  scale_shape_manual(
    values = c(19, 17, 15, 18),
    breaks = c("S","B","M", "CT"),
    labels = c("Road Salt","Organic", "Inorganic", "Control"))
ca.plot = ggplot()+ 
  geom_point(data = (dotest), aes(Actual_Cl, Actual_Ca, color = Treatment, shape = Treatment), size = 6.5) +
  main.theme + 
  labs(x="", y= expression("Ca"^"2+"*" ("*mu*"g/L)")) + 
  scale_color_manual(
    values = c("#0072B2", "#DE1760","#E69F00", "black"),
    breaks = c("S","B","M", "CT"),
    labels = c("Road Salt","Organic", "Inorganic", "Control")) +  
  scale_shape_manual(
    values = c(19, 17, 15, 18),
    breaks = c("S","B","M", "CT"),
    labels = c("Road Salt","Organic", "Inorganic", "Control"))
mg.plot = ggplot()+ 
  geom_point(data = (dotest), aes(Actual_Cl, Actual_Mg, color = Treatment, shape = Treatment), size = 6.5) +
  main.theme + 
  labs(x="Chloride (mg/L)", y= expression("Mg"^"2+"*" ("*mu*"g/L)")) + 
  scale_color_manual(
    values = c("#0072B2", "#DE1760","#E69F00", "black"),
    breaks = c("S","B","M", "CT"),
    labels = c("Road Salt","Organic", "Inorganic", "Control")) +  
  scale_shape_manual(
    values = c(19, 17, 15, 18),
    breaks = c("S","B","M", "CT"),
    labels = c("Road Salt","Organic", "Inorganic", "Control"))
k.plot = ggplot()+ 
  geom_point(data = (dotest), aes(Actual_Cl, Actual_K, color = Treatment, shape = Treatment), size = 6.5) +
  main.theme + 
  labs(x="Chloride (mg/L)", y= expression("K"^"+"*" ("*mu*"g/L)"), title = "") +
  scale_color_manual(
    values = c("#0072B2", "#DE1760","#E69F00", "black"),
    breaks = c("S","B","M", "CT"),
    labels = c("Road Salt","Organic", "Inorganic", "Control")) +  
  scale_shape_manual(
    values = c(19, 17, 15, 18),
    breaks = c("S","B","M", "CT"),
    labels = c("Road Salt","Organic", "Inorganic", "Control"))
setwd("/Users/troymartin/Library/CloudStorage/OneDrive-Queen'sUniversity/MSc/Analysis/Figures/Bacteria")
png("Cations.Paper.png",width=1000,height=800)
ggarrange(na.plot, ca.plot, mg.plot, k.plot, ncol=2, nrow=2, common.legend = TRUE, legend="none")
dev.off()

########################################
### PH GRAPHS
## Adding in pH file 
ph = read.csv("~/Library/CloudStorage/OneDrive-Queen'sUniversity/MSc/Analysis/pH_All.csv")
ph = select(ph, -c(7:15))

ph = inner_join(ph, meso.id, by = "sampleID")
ph$Treatment = ph$Treatment.x
ph = select(ph, -c(2, 3, 6:8, 10, 12:15))
ph6 = filter(ph, Week == 6)
ph16 = filter(ph, Week == 6 | Week == 1)

# Adding CT to pH 
filter(ph16, Nominal_Cl == 6)
test = c()
test3 = c(6, 7.30, "M27_W6", 6, 9.243800, "CT")
test1 = c(6, 7.44, "M58_W6", 6, 0, "CT") 
test2 = c(6, 7.24, "M52_W6", 6, 0, "CT")
test4 = c(1, 7.93, "M27_W6", 6, 9.243800, "CT")
test5 = c(1, 8.06, "M58_W6", 6, 0, "CT")
test6 = c(1, 7.97, "M52_W6", 6, 0, "CT")
test = rbind(test3, test1, test2, test4, test5, test6)
test = as.data.frame(test)
#test = t(test)
colnames(test) = c("Week", "pH", "sampleID", "Nominal_Cl", "Actual_Cl", "Treatment")
phtest = rbind(ph16, test)
phtest$Actual_Cl = as.numeric(phtest$Actual_Cl)
phtest$pH = as.numeric(phtest$pH)
phtest$Treatment = as.factor(phtest$Treatment)
phtest = phtest[-c(1, 21, 41, 61, 81, 101),]
write.csv(phtest, "/Users/troymartin/Library/CloudStorage/OneDrive-Queen'sUniversity/MSc/Analysis/Figures/Bacteria/phtest.csv", 
          row.names = F)
phtest1 = read.csv("~/Library/CloudStorage/OneDrive-Queen'sUniversity/MSc/Analysis/Figures/Bacteria/phtest1.csv")
phplot = ggplot()+ 
  geom_point(data = phtest1, aes(Actual_Cl, pH, color = wktreat, shape = Treatment), size = 6.5) +
  main.theme + 
  labs(x="Chloride (mg/L)", y= "pH") +
  scale_color_manual(
    values = c("#15abff", "#f38bb1", "#ffd370", "gray33", "#0072B2", "#DE1760","#E69F00", "black"),
    breaks = c("1S","1B","1M", "1C", "6S","6B","6M","6C"),
    labels = c("W1 Road Salt","W1 Organic", "W1 Inorganic", "W1 Control", 
               "W6 Road Salt","W6 Organic", "W6 Inorganic", "W6 Control")) +  
  scale_shape_manual(
    values = c(19, 17, 15, 18),
    breaks = c("S","B","M", "CT"),
    labels = c("Road Salt","Organic", "Inorganic", "Control"))

setwd("/Users/troymartin/Library/CloudStorage/OneDrive-Queen'sUniversity/MSc/Analysis/Figures/Bacteria")
png("pH.Bac.png",width=1000,height=600)
ggarrange(phplot, ncol=1, nrow=1, common.legend = TRUE, legend="none")
dev.off()

#######################################
# Now to conductivity 
cond = read.csv("~/Library/CloudStorage/OneDrive-Queen'sUniversity/MSc/Analysis/Figures/Bacteria/Cond.Bac.csv")
cond6 = filter(cond, Week == 6)
cond16 = filter(cond, Week == 6 | Week == 1)

# Adding CT to cond
filter(cond16, Nominal_Cl == 6)
test = c()
test3 = c(6, 142.9, 6, 9.243800, "CT")
test1 = c(6, 155.0, 6, 0, "CT") 
test2 = c(6, 150.1, 6, 0, "CT")
test4 = c(1, 179.0, 6, 9.243800, "CT")
test5 = c(1, 182.3, 6, 0, "CT") 
test6 = c(1, 179.7, 6, 0, "CT")
test = rbind(test3, test1, test2, test4, test5, test6)
test = as.data.frame(test)
colnames(test) = c("Week", "Cond", "Nominal_Cl", "Actual_Cl", "Treatment")
condtest = rbind(cond16, test)
condtest$Actual_Cl = as.numeric(condtest$Actual_Cl)
condtest$Cond = as.numeric(condtest$Cond)
condtest$Treatment = as.factor(condtest$Treatment)
condtest = condtest[-c(1, 21, 41, 61, 81, 101),]
write.csv(condtest, "/Users/troymartin/Library/CloudStorage/OneDrive-Queen'sUniversity/MSc/Analysis/Figures/Bacteria/condtest.csv", 
          row.names = F)
condtest1 = read.csv("~/Library/CloudStorage/OneDrive-Queen'sUniversity/MSc/Analysis/Figures/Bacteria/condtest1.csv")

condplot = ggplot()+ 
  geom_point(data = condtest1, aes(Actual_Cl, Cond, color = WeekTreatment, shape = Treatment), size = 6.5) +
  main.theme + 
  labs(x="Chloride (mg/L)", y= expression("Specific Conductance ("*mu*"S/cm)")) +
  scale_color_manual(
    values = c("#15abff", "#f38bb1", "#ffd370", "gray33", "#0072B2", "#DE1760","#E69F00", "black"),
    breaks = c("1S","1B","1M", "1C", "6S","6B","6M","6C"),
    labels = c("W1 Road Salt","W1 Organic", "W1 Inorganic", "W1 Control", 
               "W6 Road Salt","W6 Organic", "W6 Inorganic", "W6 Control")) +  
  scale_shape_manual(
    values = c(19, 17, 15, 18),
    breaks = c("S","B","M", "CT"),
    labels = c("Road Salt","Organic", "Inorganic", "Control"))

setwd("/Users/troymartin/Library/CloudStorage/OneDrive-Queen'sUniversity/MSc/Analysis/Figures/Bacteria")
png("Cond.pHNEW.png",width=1400,height=600)
ggarrange(condplot, phplot, ncol=2, nrow=1, common.legend = TRUE, legend="none")
dev.off()

##########################################
# Alpha diversity for Chao1
library(phyloseq)
library(ggplot2)
library(qiime2R)

setwd("C:/Users/Collin/Documents/Postdoc Virginia/Troy")
physeq<-qza_to_phyloseq(
  features="table-dada2.qza",
  tree="SEPP-tree.qza",
  taxonomy="taxonomy.qza",
  metadata="TM-metadata.txt"
)

richness <- estimate_richness(physeq, measures = c("Chao1")) #use the original physeq object
richness = as.data.frame(richness)
plot_richness(physeq, measures=c("Chao1"), x = "samples") +  
  geom_boxplot(outlier.color=NA)

anova.sh = aov(richness$Chao1 ~ sample_data(ps)$grouping)
anova.sh = aov(richness$Chao1 ~ richness$grouping)
summary(anova.sh) # this will show you the statistical significance p value for you to report
tukey <- TukeyHSD(anova.sh)
tukey.cld <- multcompLetters4(anova.sh, tukey)
print(tukey.cld) #this will spit out letters showing the significant groupings

groupings = as.data.frame(c("HB", "HM", "HS", 'HB', "HM", 'HB', 'HM', "HS", 
                            "LM", 'LS', 'LS', 'LB', 'LS', 
                            'MM', 'MS','MB', 'MM', 'MS', 'MM', 
                            'CT', 'CT', 'CT', 
                            'LB', 'MB', 'MS', 'HS',
                            'LB', 'LM', 'LM', 'MB'))
treats = as.data.frame(c("B", "M", "S", 'B', "M", 'B', 'M', "S", 
                         "M", 'S', 'S', 'B', 'S', 
                         'M', 'S','B', 'M', 'S', 'M', 
                         'CT', 'CT', 'CT', 
                         'B', 'B', 'S', 'S',
                         'B', 'M', 'M', 'B'))
colnames(groupings) = "grouping"
colnames(treats) = "Treatment"
richness = cbind(richness, groupings)
richness = cbind(richness, treats)

rich_new = richness 

# Final plot 

ggplot()+
  geom_boxplot(data = richness, aes(x = grouping, y = Chao1, fill = Treatment)) + 
  labs(x = "", y = expression("Chao1"), legend = "Treatment") +
  scale_fill_manual(
    values = c("#000000", "#DE1760","#E69F00", "#0072B2"),
    breaks = c("CT","B","M","S"),
    labels = c("Control","Organic", "Inorganic","Road Salt"))+ 
  scale_x_discrete(limits = c("CT", "LS", "MS", "HS", "LM", "MM", "HM", "LB", "MB", "HB"),
                   labels=c("CT",
                            "LS", "MS", "HS",
                            "LM", "MM", "HM",
                            "LB", "MB", "HB"))


# Alpha diversity for Shannon

library(phyloseq)
library(ggplot2)
library(qiime2R)

setwd("C:/Users/Collin/Documents/Postdoc Virginia/Troy")
physeq<-qza_to_phyloseq(
  features="table-dada2.qza",
  tree="SEPP-tree.qza",
  taxonomy="taxonomy.qza",
  metadata="TM-metadata.txt"
)

richness <- estimate_richness(physeq, measures = c("Shannon")) #use the original physeq object
richness = as.data.frame(richness)
plot_richness(physeq, measures=c("Shannon"), x = "samples") +  
  geom_boxplot(outlier.color=NA)

anova.sh = aov(richness$Shannon ~ sample_data(ps)$grouping)
anova.sh = aov(richness$Shannon ~ richness$grouping)
summary(anova.sh) # this will show you the statistical significance p value for you to report
tukey <- TukeyHSD(anova.sh)
tukey.cld <- multcompLetters4(anova.sh, tukey)
print(tukey.cld) #this will spit out letters showing the significant groupings

groupings = as.data.frame(c("HB", "HM", "HS", 'HB', "HM", 'HB', 'HM', "HS", 
                            "LM", 'LS', 'LS', 'LB', 'LS', 
                            'MM', 'MS','MB', 'MM', 'MS', 'MM', 
                            'CT', 'CT', 'CT', 
                            'LB', 'MB', 'MS', 'HS',
                            'LB', 'LM', 'LM', 'MB'))
treats = as.data.frame(c("B", "M", "S", 'B', "M", 'B', 'M', "S", 
                         "M", 'S', 'S', 'B', 'S', 
                         'M', 'S','B', 'M', 'S', 'M', 
                         'CT', 'CT', 'CT', 
                         'B', 'B', 'S', 'S',
                         'B', 'M', 'M', 'B'))
colnames(groupings) = "grouping"
colnames(treats) = "Treatment"
richness = cbind(richness, groupings)
richness = cbind(richness, treats)

rich_new = richness 

# Final plot 

ggplot()+
  geom_boxplot(data = richness, aes(x = grouping, y = Shannon, fill = Treatment)) + 
  labs(x = "", y = expression("Shannon"), legend = "Treatment") +
  scale_fill_manual(
    values = c("#000000", "#DE1760","#E69F00", "#0072B2"),
    breaks = c("CT","B","M","S"),
    labels = c("Control","Organic", "Inorganic","Road Salt"))+ 
  scale_x_discrete(limits = c("CT", "LS", "MS", "HS", "LM", "MM", "HM", "LB", "MB", "HB"),
                   labels=c("CT",
                            "LS", "MS", "HS",
                            "LM", "MM", "HM",
                            "LB", "MB", "HB"))


##########################################
# Bubble plot

library(phyloseq)
library(ggplot2)
library(qiime2R)

setwd("C:/Users/Collin/Documents/Postdoc Virginia/Troy")
physeq<-qza_to_phyloseq(
  features="table-dada2.qza",
  tree="SEPP-tree.qza",
  taxonomy="taxonomy.qza",
  metadata="TM-metadata.txt"
)

physeq2 = filter_taxa(physeq, function(x) mean(x) > 0.3, TRUE) #filter the low abundant taxa out
physeq3 = subset_taxa(physeq2, (Genus!="NA")) #this removed any taxa without a Genus assigned
physeq4 = subset_taxa(physeq3, (Genus!="uncultured")) #this removed anything designated uncultured
ps <- tax_glom(physeq4, "Genus", NArm=FALSE) # add ,NArm=FALSE) to restrict ASVs unclassified to the genus level to make a cleaner plot
ps0 <- transform_sample_counts(ps, function(x) x / sum(x)) #this makes everything into average relative abundance
ps1 <- merge_samples(ps0, "grouping") #this is where it merges all those samples into averages for the treatments just make sure the �condition� matches what you have in your metadata categorical column
ps2 <- transform_sample_counts(ps1, function(x) x / sum(x)) #this makes everything into average relative abundances again after merging

data_glom<- psmelt(ps2) # create dataframe from phyloseq object to be able to plot it all
data_glom$Genus <- as.character(data_glom$Genus) #convert to character
data_glom$Sample = as.factor(data_glom$Sample)

#simple way to rename grouped genera with below threshold
data_glom$Genus[data_glom$Abundance < 0.03] <- "< 3% Abundant" #remember to change this if you change the value above

# Count to set color palette
Count = length(unique(data_glom$Genus))
Count # this will just tell you how many genera you have on the plot I forget, so if its super high then adjust

unique(data_glom$Genus) #this tells you the names of the genera that will be on the plot

# build colour palette
# this was a custom colour palette I made if you want to use it the number of colours has to match the number of unique genera AKA the number that pops out when you run the line 3 up �Count�
myPalette2 = c("white","#ff6961","#ffb480","#ffd500","#42d6a4","#08cad1","#59adf6","#9d94ff","#c780e8","#01eebf","#d5001c",
               "#029cdf","#ff3f2a","#3644c5","#fff184","#6e90ff","#be9200","#006abb","#9e6100","#ffa1ff","#6b5d00","#e60064",
               "#b1ffd5","#962f4c","#b0d1ff","#ff736c","#01637e","#ffdda9","#806e8e","#52582b", "#000000","#4DAA57","#86BBD8",
               "#A54657", "darkblue", "darkgoldenrod1", "darkseagreen", "darkorchid", "darkolivegreen1", "lightskyblue", 
               "darkgreen", "deeppink", "khaki2", "firebrick", "brown1", "darkorange1", "cyan1", "royalblue4", "darksalmon")

# "#582630", "#F7EE7F", "#F1A66A","#F26157", "#679289", "#33658A","#F6AE2D","#F9ECCC"

# barplots with average relative abundance for genera
levels = c("CT", "HB", "HM", "HS", "MB", "MM", "MS", "LB", "LM", "LS") # reordering the data 
levels.new = c("CT", "LS", "MS", "HS", "LM", "MM", "HM", "LB", "MB", "HB")
spatial_plot = ggplot(data=data_glom, aes(x=factor(Sample, level = levels.new), y=Abundance, fill=Genus))

gorder = c("< 3% Abundant","Candidatus Rhodoluna", "Clavibacter", "Corynebacterium", "Rhodococcus","Faecalibacterium","Bacteroides",
          "Flavobacterium", "Sediminibacterium","Acetobacterium", "Clostridium", "Lachnospira", "Mycobacterium",
          "Ruminococcus", "Streptococcus","Acinetobacter", "Agrobacterium", "Aminobacter", "C39", "Desulfovibrio",
          "Devosia", "Hydrogenophaga", "Limnohabitans", "Novosphingobium", "Paracoccus", "Prevotella", "Psychrobacter",
          "Rhodobacter", "Rhodoferax", "Sphingomonas", "Staphylococcus", "Sulfurospirillum", "Xanthobacter","Cloacibacterium")

data_glom$Genus = factor(data_glom$Genus, levels = gorder)
# Bubble plot
xx = ggplot(data_glom, aes(x = factor(Sample, level = levels.new), y = Genus)) +
  geom_point(aes(size = Abundance*100, fill=Sample), alpha = 1, shape = 21) + # abundance *100 to convert to percentage, make alpha = 0.75 if there is overlap
  scale_size_continuous(limits = c(0.000001, 100), range = c(1,15), breaks = c(1,10,20,50)) +
  labs( x= "", y = "Average Relative Abundance (%)", size = "Relative Abundance (%)", fill = "")  +
  theme(legend.key=element_blank(),
        axis.text.x = element_text(colour = "black", size = 12, angle = 0, vjust = 0.3, hjust = 0.5),
        axis.text.y = element_text(colour = "black", size = 9),
        legend.text = element_text(size = 10, face ="bold", colour ="black"),
        legend.title = element_text(size = 11, face = "bold"),
        panel.background = element_blank(),
        #panel.border = element_rect(colour = "black", fill = NA, size = 1.2),
        legend.position = "bottom",
        panel.grid.major.y = element_line(colour = "grey95")) +
  scale_y_discrete(limits=rev) + # makes y axis in alphabetical from top down
  guides(fill = "none")

xx # plot

##########################################
## Heat map 

This is the correct heat map from the ANCOMBC analysis. 

```{r}
library(ANCOMBC)
library(tidyverse)
library(pheatmap)

physeq<-qza_to_phyloseq(
  features="table-dada2.qza",
  tree="SEPP-tree.qza",
  taxonomy="taxonomy.qza",
  metadata="TM-metadata.txt"
)


# filter out low abundant taxa <1% its safe to keep this as 1% because you just don�t want stuff 
# showing up as differentially abundant if its super low and doesn�t REALLY change much but would still get picked up

# filter out NAs
pss = filter_taxa(physeq, function(x) mean(x) > 0.1, TRUE)

#physeq2 = subset_taxa(pss, (Kingdom=="d__Archaea"))
#physeq3 = subset_taxa(physeq, (Kingdom!="d__Bacteria")) #d__Eukaryota d__Bacteria Kingdom=="d__Bacteria" d__Archaea
physeq41 = subset_taxa(pss, (Kingdom!="d__Eukaryota"))
physeq51 = subset_taxa(physeq41, (Kingdom!="unassigned"))
physeq61 = subset_taxa(physeq51, (Genus!="Mitochondria"))
physeq71 = subset_taxa(physeq61, (Genus!="Chloroplast"))
physeq81 = subset_taxa(physeq71, (Genus!="NA"))
physeq91 = subset_taxa(physeq81, (Genus!="uncultured")) # Added as there are multiple groups with this genus


# restrict to family
ps <- tax_glom(physeq91, "Family")

# run the model 
out = ancombc(phyloseq = ps, formula = "grouping", 
              p_adj_method = "holm", prv_cut = 0.10, lib_cut = 0, 
              group = "grouping", struc_zero = TRUE, neg_lb = TRUE, tol = 1e-5, 
              max_iter = 100, conserve = TRUE, alpha = 0.05, global = TRUE)


res <- out$res
res_global = out$res_global


# WHich ones are differentially abundant 
col_name=c("Taxon", "CT", "HB", "HM", "HS", "LB", "LM", "LS", "MB", "MM", "MS")


tab_diff= res$diff_abn
tab_diff=tab_diff %>%
  rownames_to_column("taxon")
colnames(tab_diff) = col_name

library(DT)
# LFC
tab_lfc = res$lfc
tab_lfc= tab_lfc %>%
  rownames_to_column("taxon")
colnames(tab_lfc) = col_name

tab_lfc %>% 
  datatable(caption = "Log Fold Changes from the Primary Result") %>%
  formatRound(col_name[-1], digits = 2)

tab_se = res$se
tab_se= tab_se %>%
  rownames_to_column("taxon")
colnames(tab_se) = col_name
tab_se %>% 
  datatable(caption = "SEs from the Primary Result") %>%
  formatRound(col_name[-1], digits = 2)


# Prep for visualization 

df_lfc = data.frame(tab_lfc[, -1] * tab_diff[, -1], check.names = FALSE) %>%
    mutate(taxon_id = tab_diff$Taxon) %>%
    dplyr::select(taxon_id, everything())
df_se = data.frame(tab_se[, -1] * tab_diff[, -1], check.names = FALSE) %>% 
  mutate(taxon_id = tab_diff$Taxon) %>%
    dplyr::select(taxon_id, everything())
colnames(df_se)[-1] = paste0(colnames(df_se)[-1], "SE")

# Bias corrected abundances 
samp_frac = out$samp_frac
# Replace NA with 0
samp_frac[is.na(samp_frac)] = 0 
# Add pesudo-count (1) to avoid taking the log of 0
log_obs_abn = log(out$feature_table + 1)
# Adjust the log observed abundances
log_corr_abn = t(t(log_obs_abn) - samp_frac)

# I think we want the global result 
sig_taxa=res_global %>%
  filter(diff_abn==TRUE) %>%
  rownames_to_column("taxon")# 63 taxa that are sig differentially abundant 

df_tax= tab_lfc %>%
  filter(Taxon %in% sig_taxa$taxon)

df_heat= df_tax %>%
  pivot_longer(cols = -one_of("Taxon"),
                 names_to = "region", values_to = "value") %>%
    mutate(value = round(value, 2))
df_heat$Taxon = factor(df_heat$Taxon, levels = sort(sig_taxa$taxon))


lo = floor(min(df_heat$value))
up = ceiling(max(df_heat$value))
mid = (lo + up)/2


df_heat$region <- factor(df_heat$region, levels = c("CT", "LS", "MS", "HS", "LM", "MM", "HM", "LB", "MB", "HB"))
df_heat2=df_heat%>%
  filter(region!="CT")


p_heat = df_heat2 %>%
  ggplot(aes(x = region, y = Taxon, fill = value)) + 
  geom_tile(color = "black") +
  scale_fill_gradient2(low = "dodgerblue4", high = "firebrick", mid = "white", 
                       na.value = "white", midpoint = mid, limit = c(lo, up),
                       name = NULL) +
  #geom_text(aes(region, Taxon, label = value), color = "black", size = 4) +
  labs(x = NULL, y = NULL) +
  guides(fill=guide_legend(title="log fold change")) +
  theme_minimal() +
  theme(axis.text.x = element_text(size = 12),
        axis.text.y=element_text(size=6))
p_heat

res_global

```

All families in the plot showed significance (p<0.05) in the global test results of the ANCOMBC analysis where microbial families that showed differential abundance between at least two groups. 

Global test results of ANCOMBC are comparing taxa that are differentially abundant between at least two groups across all treatments. Identified microbial families that show this difference 
plot is showing log fold change in 


## ANCOMBC on select genera 

```{r}
# restrict to genus
ps_gen <- tax_glom(physeq91, "Genus")

# run the model 
out_gen = ancombc(phyloseq = ps_gen, formula = "grouping", 
              p_adj_method = "holm", prv_cut = 0.10, lib_cut = 0, 
              group = "grouping", struc_zero = TRUE, neg_lb = TRUE, tol = 1e-5, 
              max_iter = 100, conserve = TRUE, alpha = 0.05, global = TRUE)


res_gen <- out_gen$res
res_global_gen = out_gen$res_global

# Check the genera of interest 
res_global %>%
  rownames_to_column("Genus") %>%
  filter(Genus=="Devosia" | Genus=="Flavobacterium")
